# Supplementary material
Source: PubMed Central journal article supplement (PMC4533874)

Supplementary Figure - Uncropped scans with size marker indications

Figure 1j

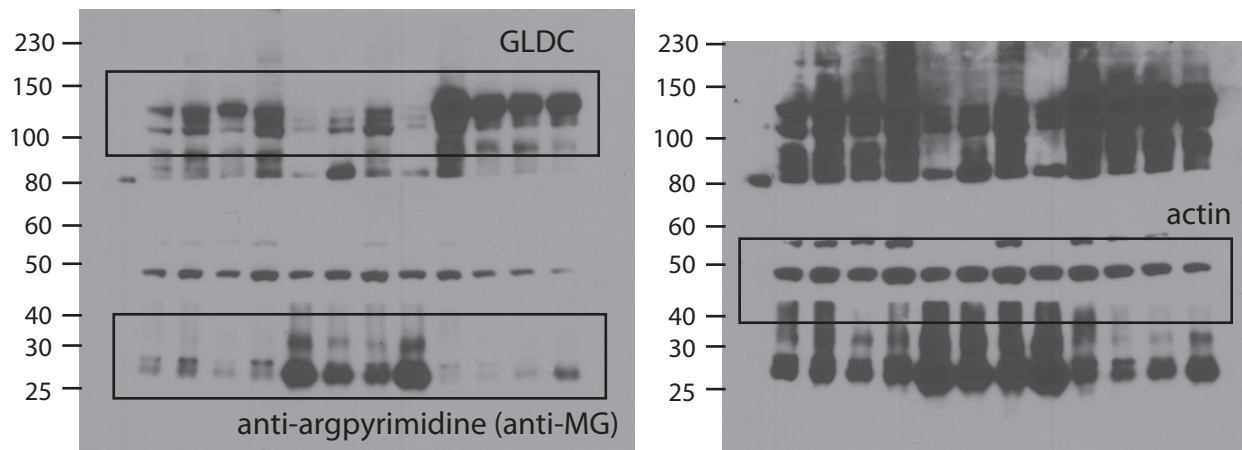

Figure 2d

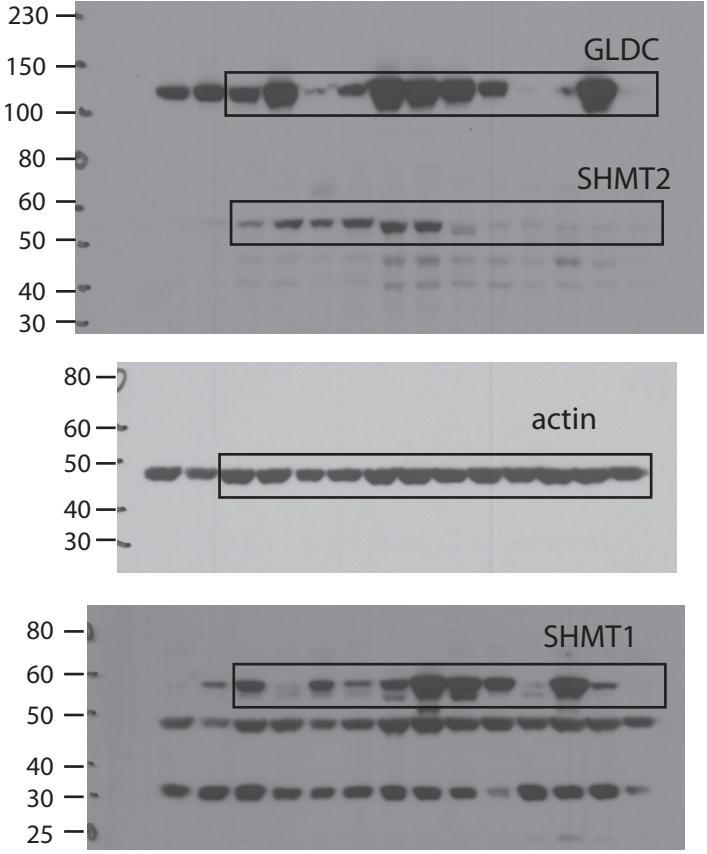

Figure 4b

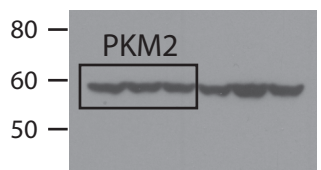

Ext Data Fig 1b Ext Data Fig 1c

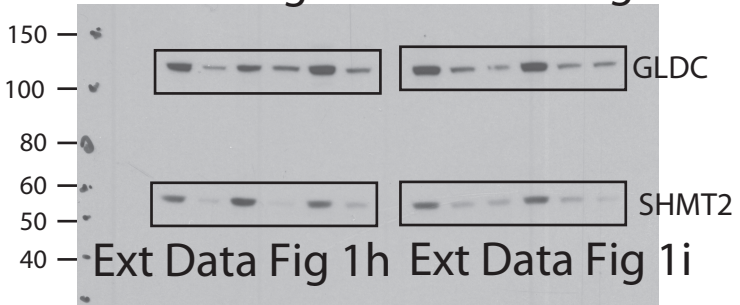

Ext Data Fig 1d

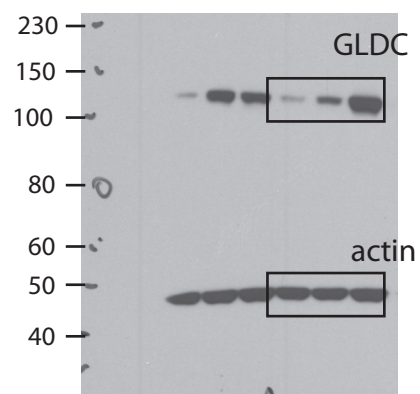

Ext Data Fig 1h Ext Data Fig 1i

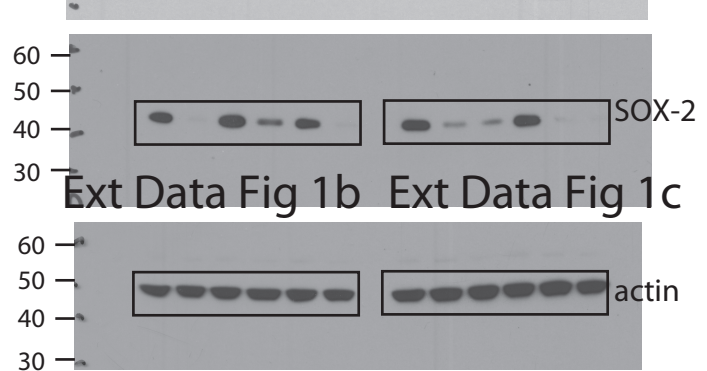

Ext Data Fig 1g

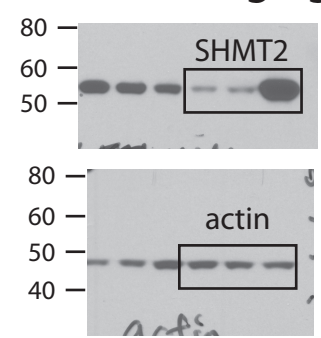

Ext Data Fig 2d

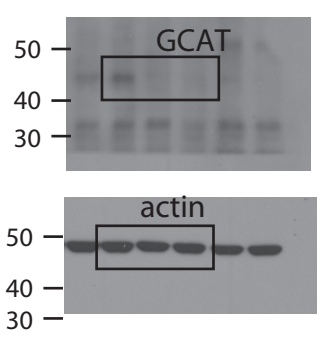

Ext Data Fig 2g

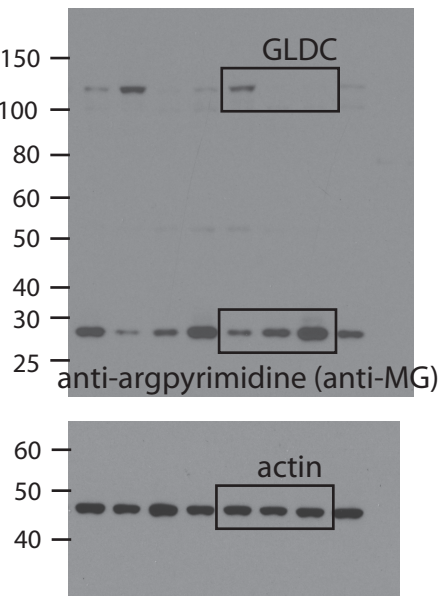

Ext Data Fig 2h

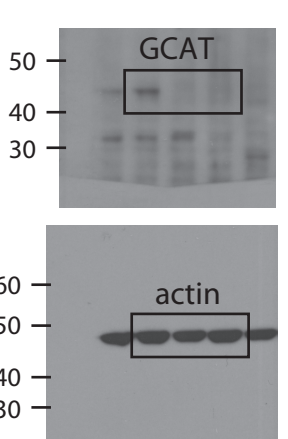

Ext Data Fig 2i

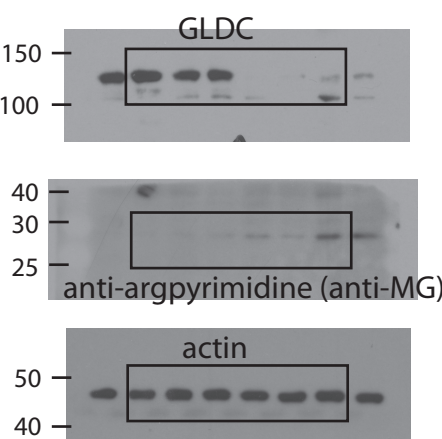

Ext Data Fig 3d

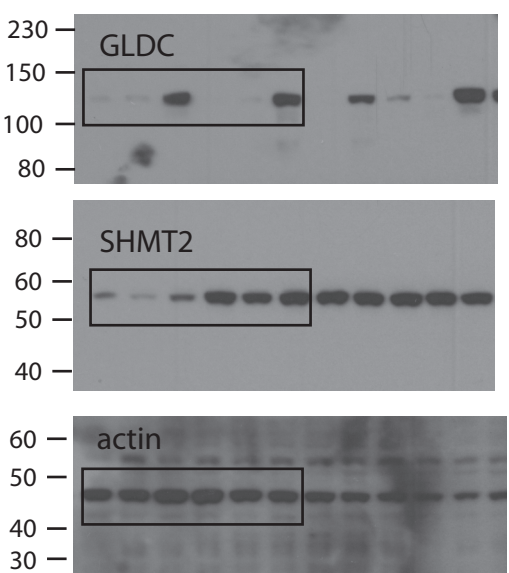

Ext Data Fig 5h

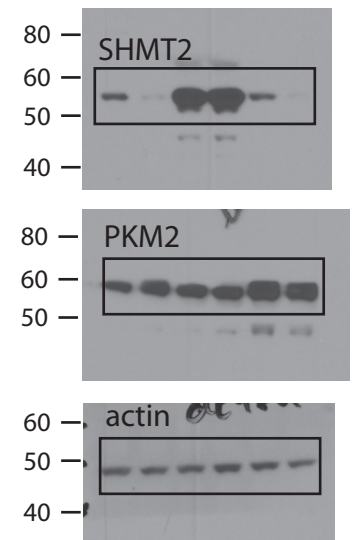

Supplement: NIHMS669411-supplement-1.pdf [file NIHMS669411-supplement-1.pdf]
